# Supplementary material for: Bayesian Test for Colocalisation between Pairs of Genetic Association Studies Using Summary Statistics
Source: PubMed Central journal article supplement (PMC4022491; doi:10.1371/journal.pgen.1004383), 2014-05-15
Supplement: pgen.1004383.s005.pdf [file pgen.1004383.s005.pdf]

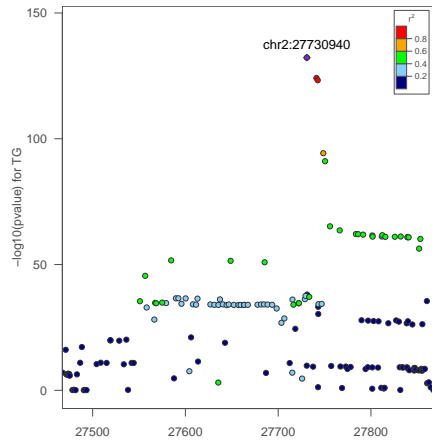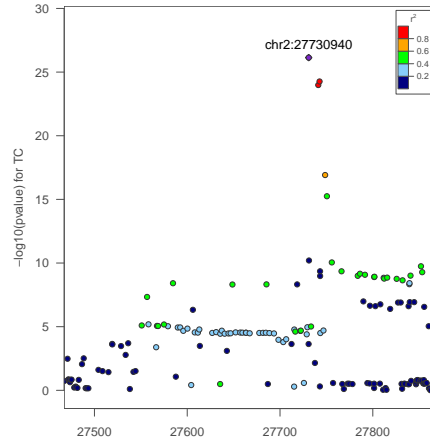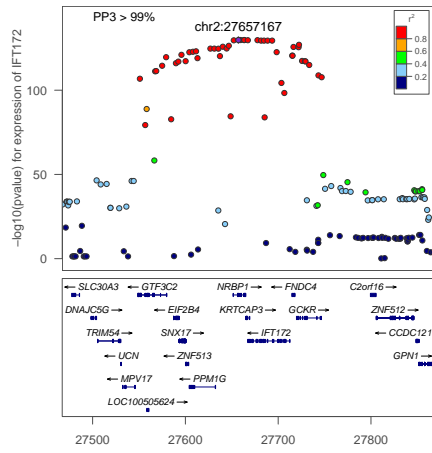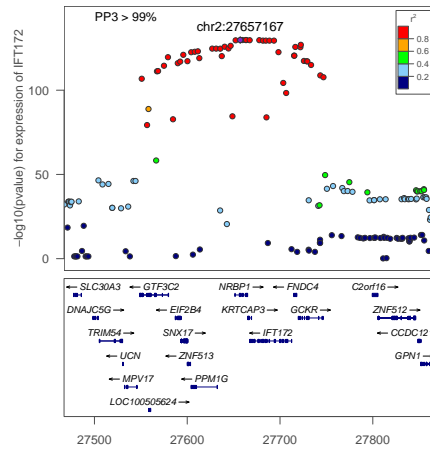

(1) IFT172/TG

(2) IFT172/TC

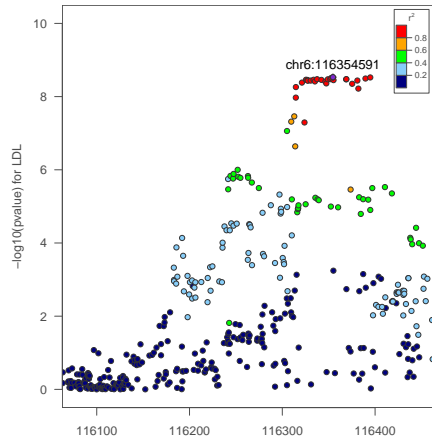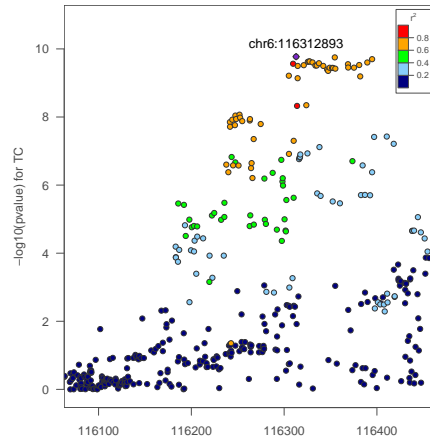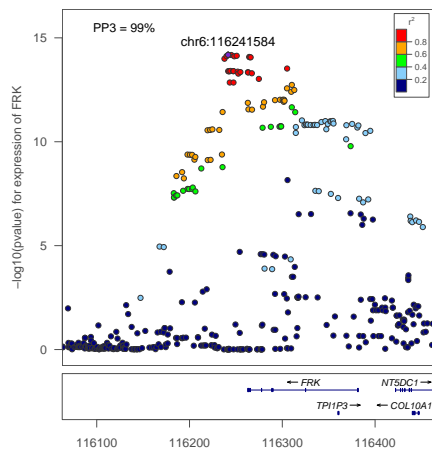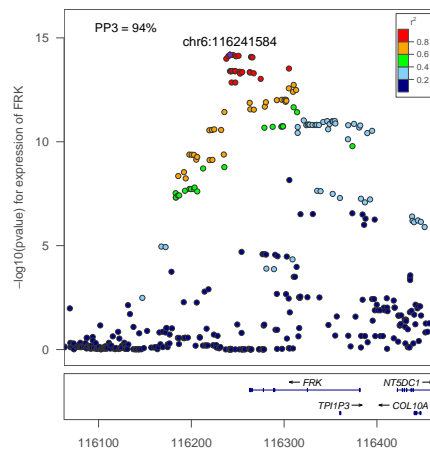

(3) FRK/LDL

(4) FRK/TC

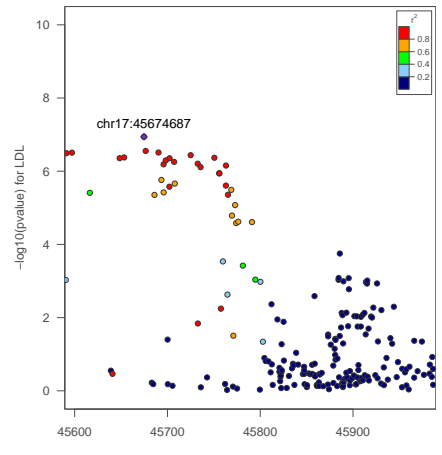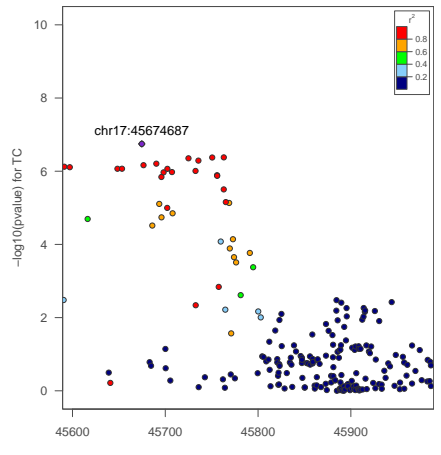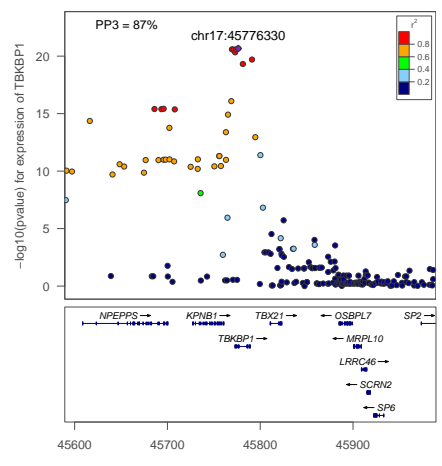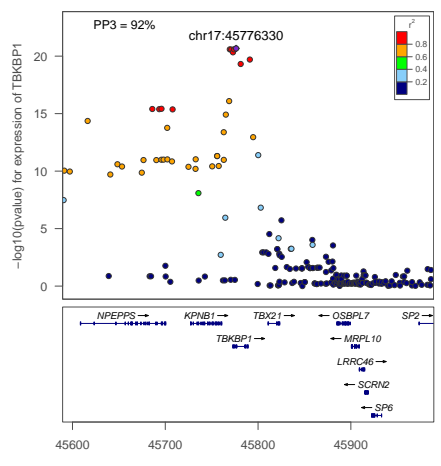

(5) TBKBP1/LDL

(6) TBKBP1/TC

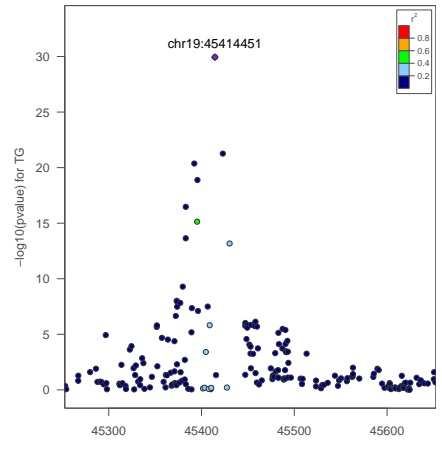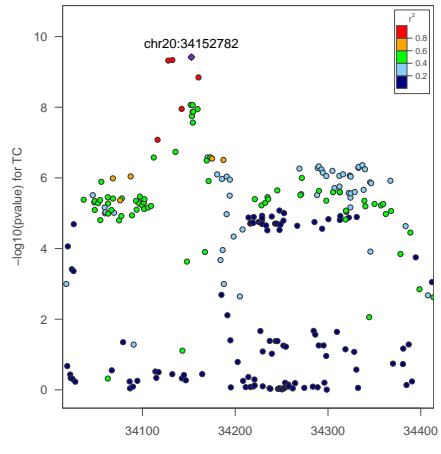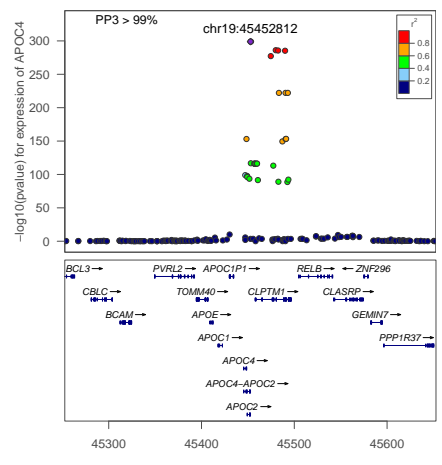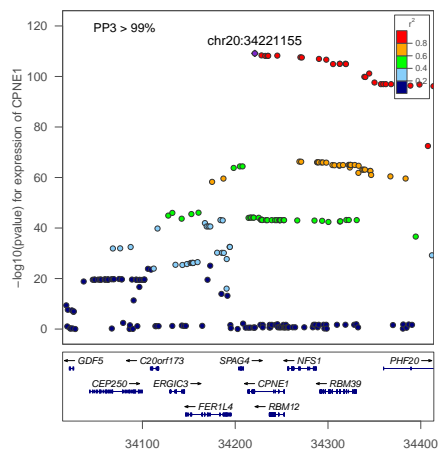

(7) APOC4/TG

(8) CPNE1/TC
