# Supplementary material for: Bayesian Test for Colocalisation between Pairs of Genetic Association Studies Using Summary Statistics
Source: PubMed Central journal article supplement (PMC4022491; doi:10.1371/journal.pgen.1004383), 2014-05-15
Supplement: pgen.1004383.s007.pdf [file pgen.1004383.s007.pdf]

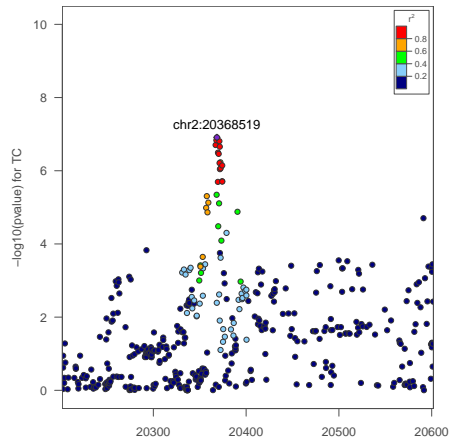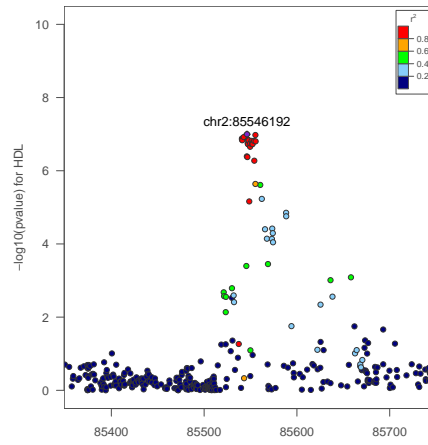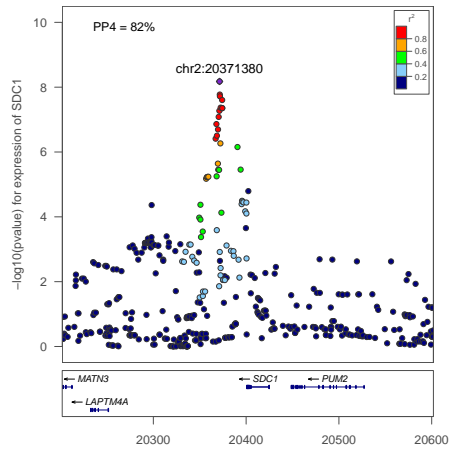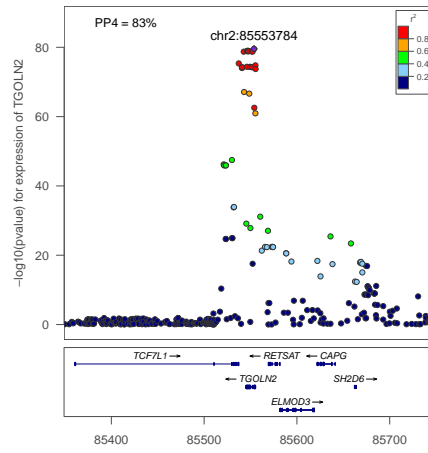

(1) SDC1/TC

(2) TGOLN2/HDL

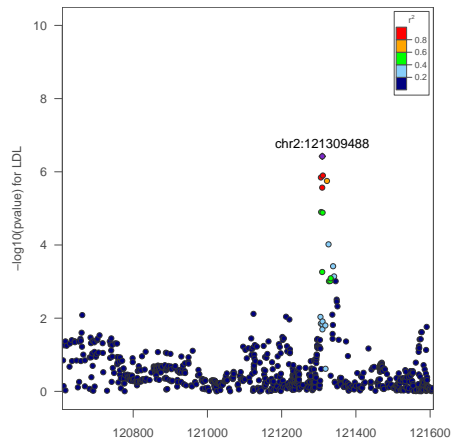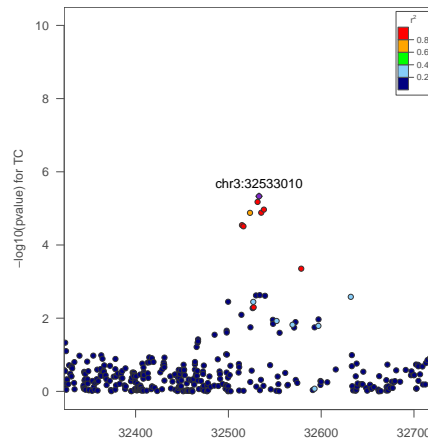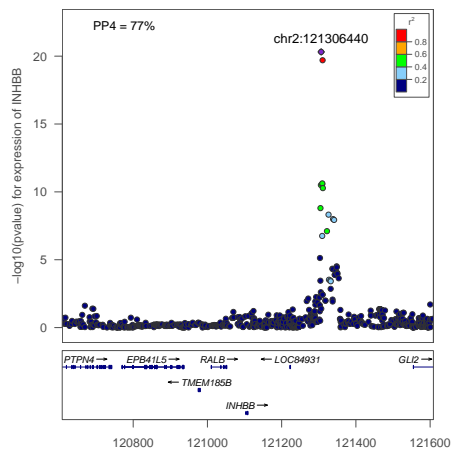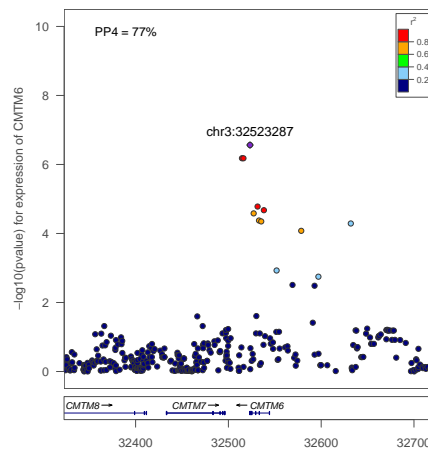

(3) INHBB/LDL

(4) CMTM6/TC

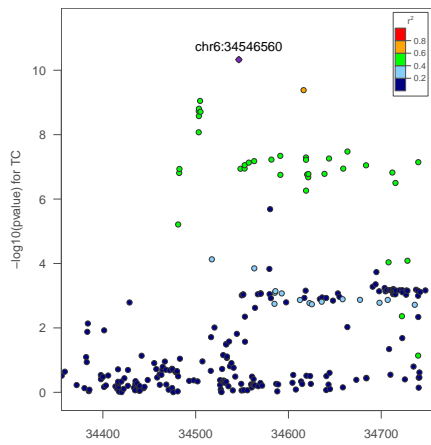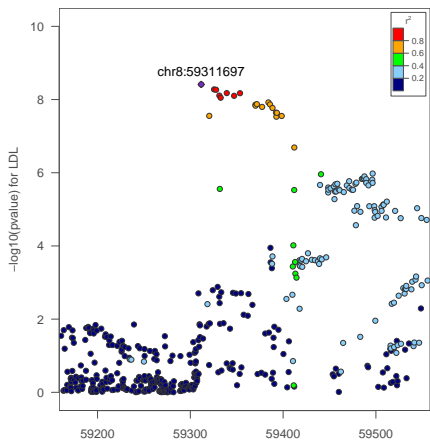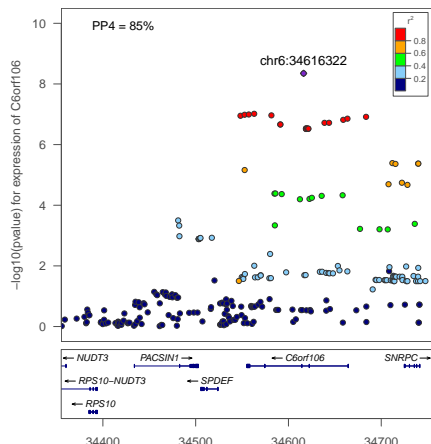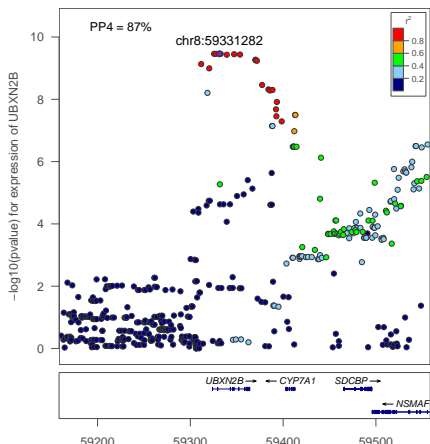

(5) C6orf106/TC

(6) UBXL2B/LDL

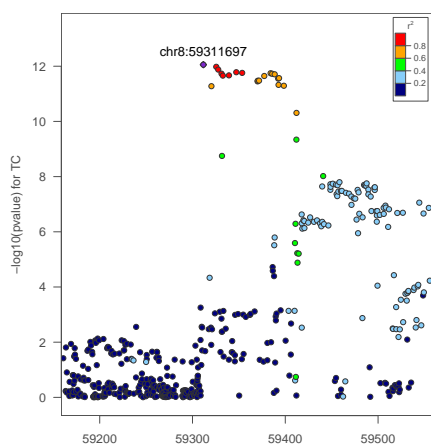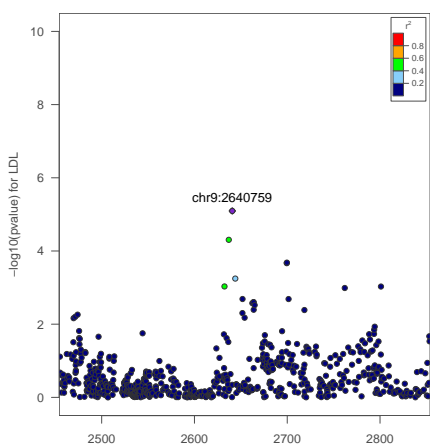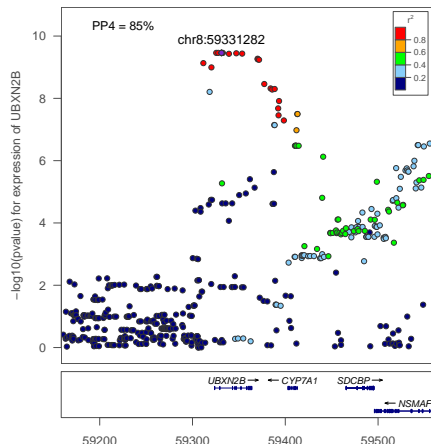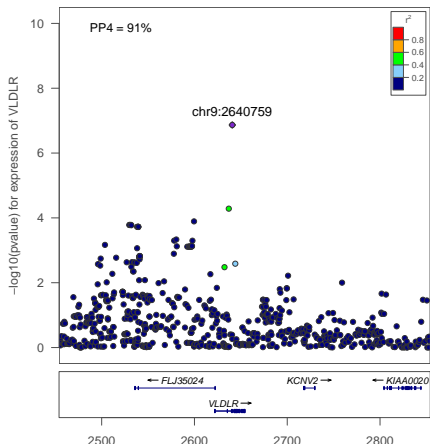

(7) UBXL2B/TC

(8) VLDLR/LDL

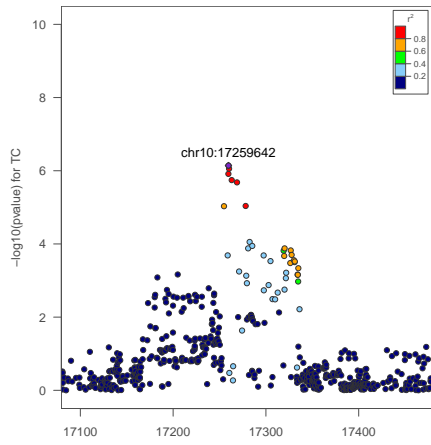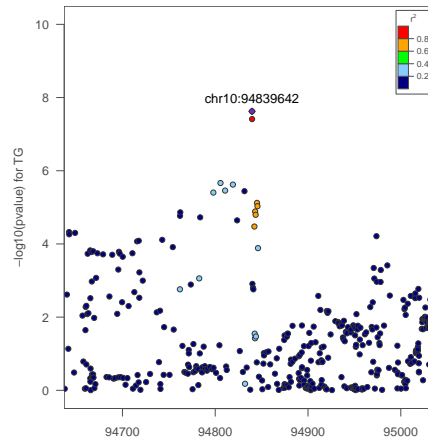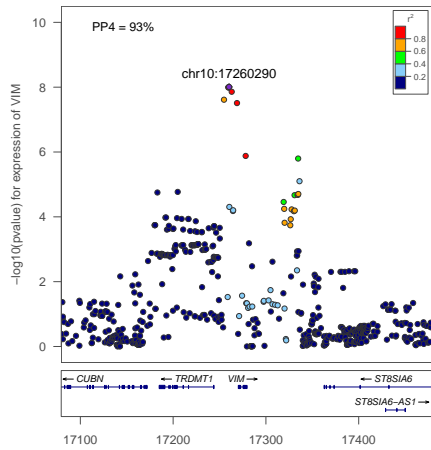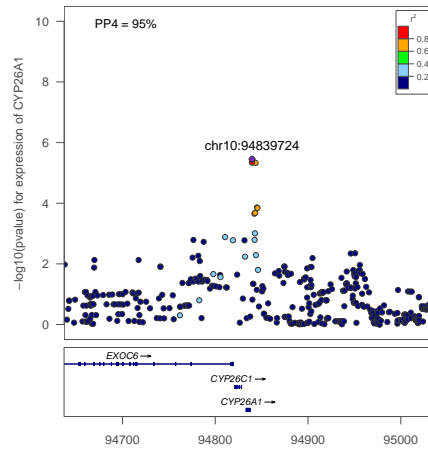

(9) VIM/TC

(10) CYP26A1/TG

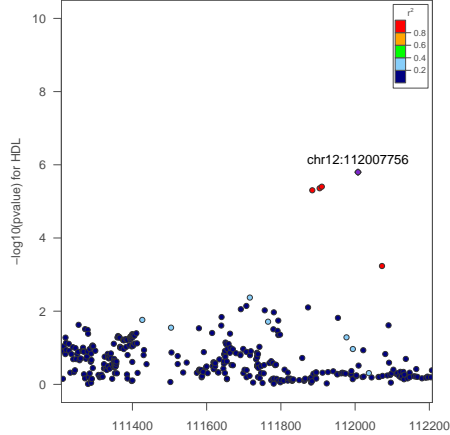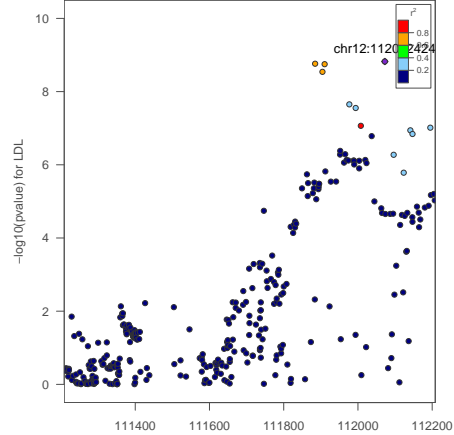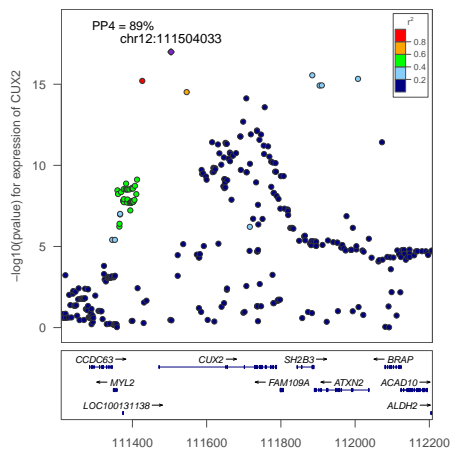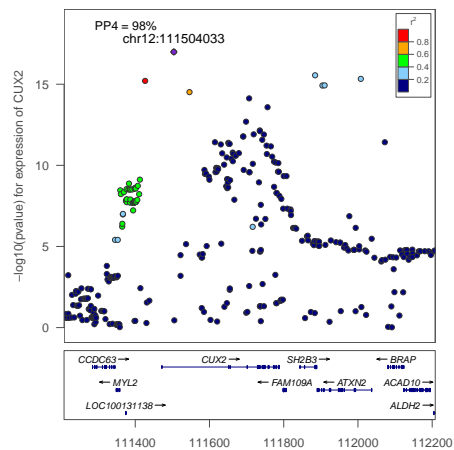

(11) CUX2/HDL

(12) CUX2/LDL

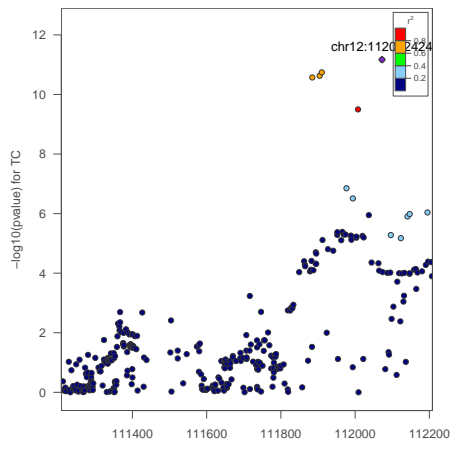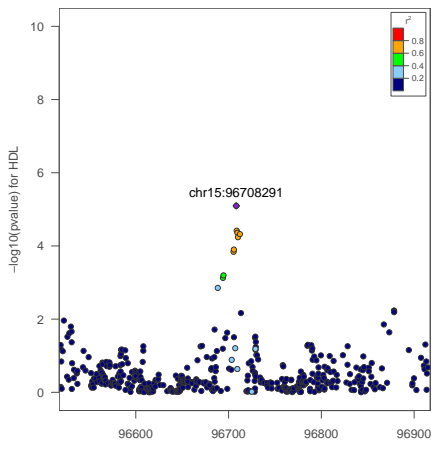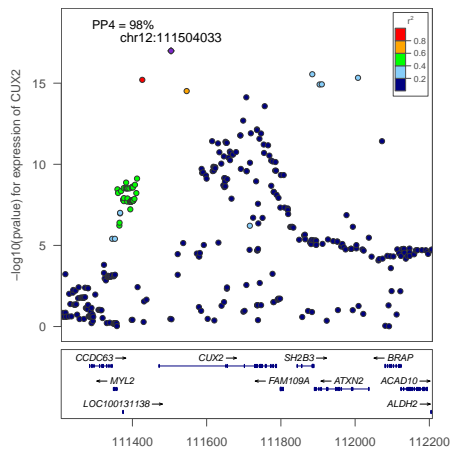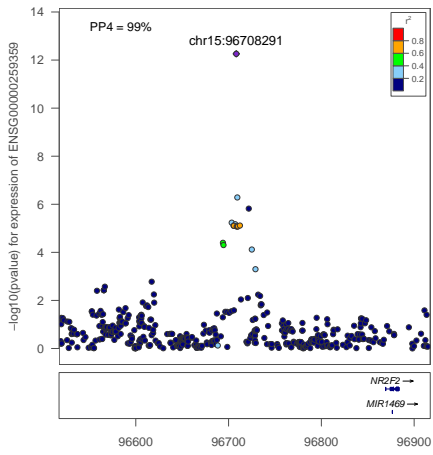

(13) CUX2/TC

(14) ENSG00000259359/HDL

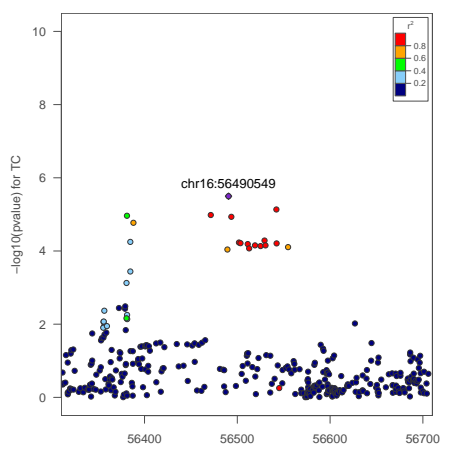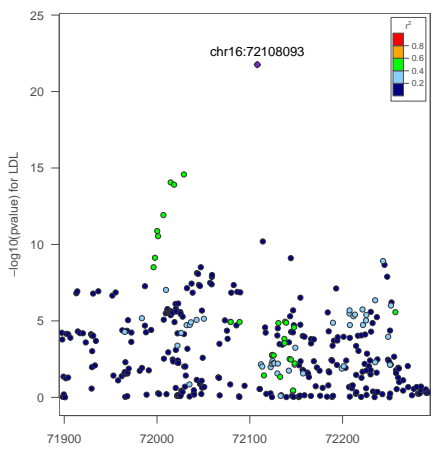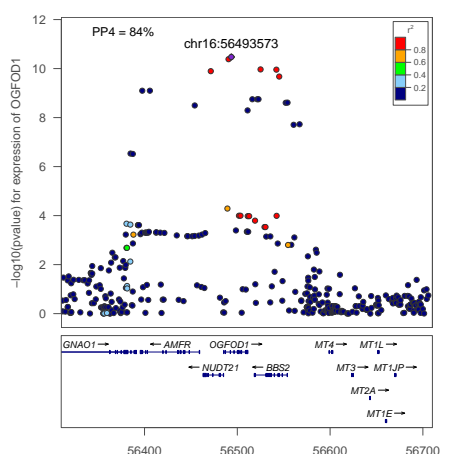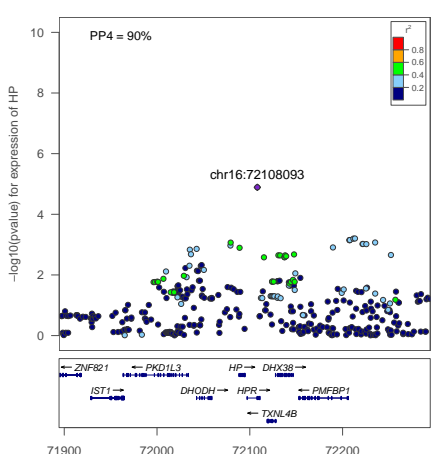

(15) OGFOD1/TC

(16) HP/LDL

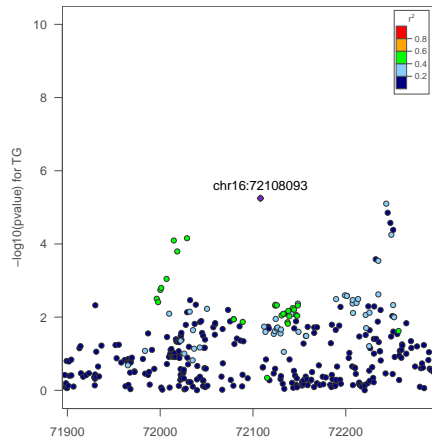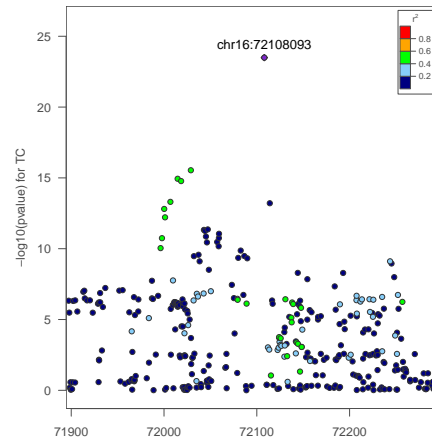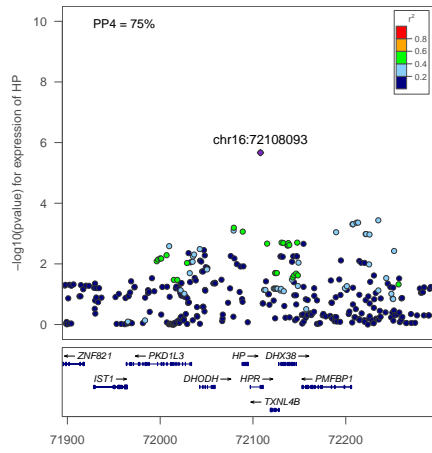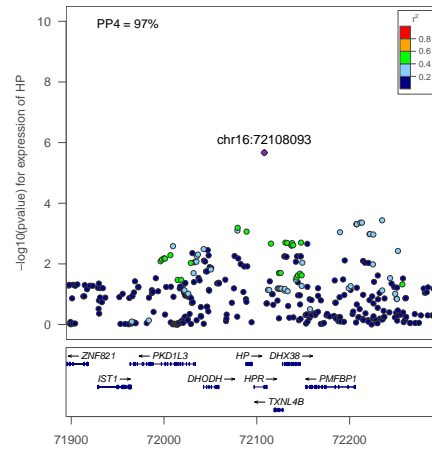

(17) HP/TG

(18) HP/TC

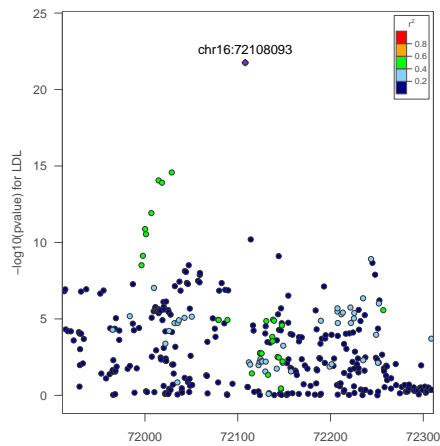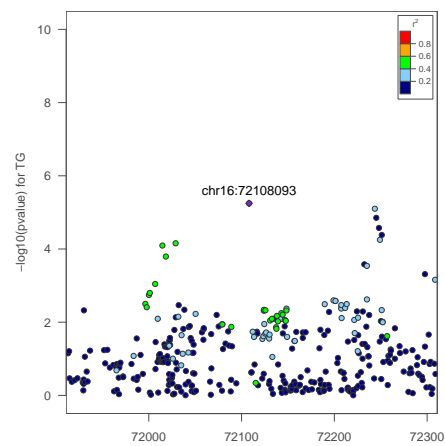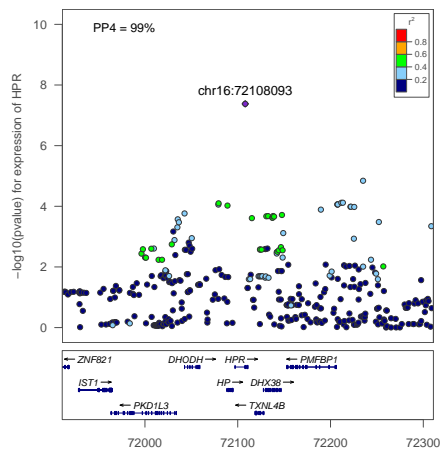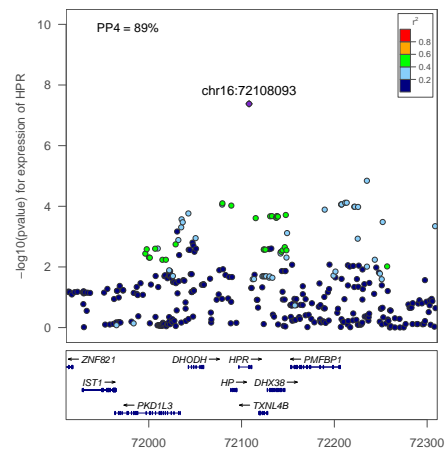

(19) HPR/LDL

(20) HPR/TG

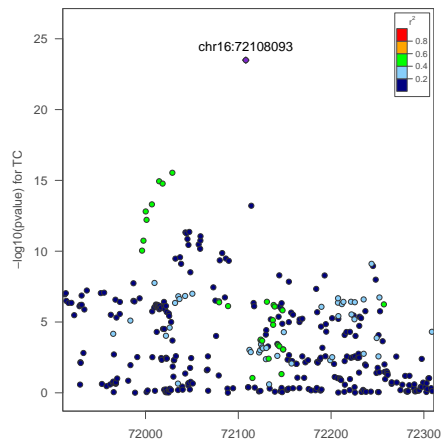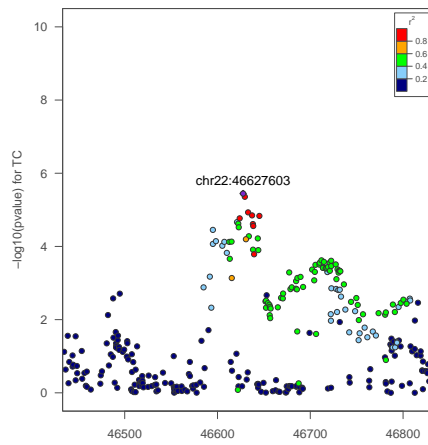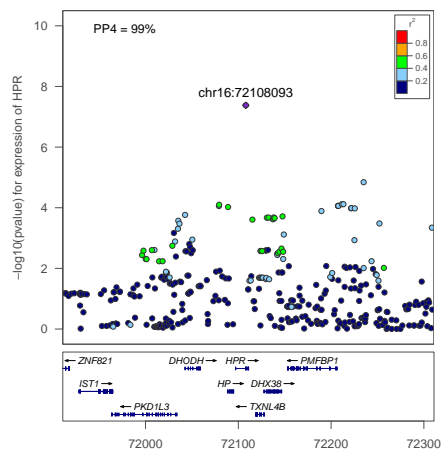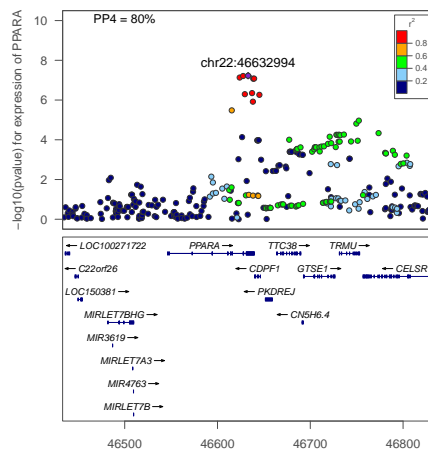

(21) HPR/TC

(22) PPARA/TC
