# Supplementary material for: Bayesian Test for Colocalisation between Pairs of Genetic Association Studies Using Summary Statistics
Source: PubMed Central journal article supplement (PMC4022491; doi:10.1371/journal.pgen.1004383), 2014-05-15
Supplement: pgen.1004383.s010.pdf [file pgen.1004383.s010.pdf]

Table S1. Results using reported loci that localise with liver eQTL

| geneTranscriptsymbol | TranscriptPvalueTesl | Trait | Chr | Region              | Biom pval | Biom SNP   | eQTL pval | eQTL SNP   | Best Causal | $p_{12} = 10^{-5}$ |         | $p_{12} = 2 \times 10^{-6}$ |         | $p_{12} = 10^{-6}$ |         |
|----------------------|----------------------|-------|-----|---------------------|-----------|------------|-----------|------------|-------------|--------------------|---------|-----------------------------|---------|--------------------|---------|
|                      |                      |       |     |                     |           |            |           |            |             | PP3 (%)            | PP4 (%) | PP3 (%)                     | PP4 (%) | PP3 (%)            | PP4 (%) |
| RHCE                 | 7.00E-54             | LDL   | 1   | 25488927:25888986   | 1.24E-10  | rs12027135 | 1.20E-66  | rs686631   | rs12027135  | 1                  | 99      | 6                           | 94      | 12                 | 88      |
|                      |                      |       | 1   | 25515852:25915911   | 1.24E-10  | rs12027135 | 1.20E-16  | rs909832   | rs12027135  | 84                 | 16      | 96                          | 4       | 98                 | 2       |
| RHD                  | 4.00E-08             | LDL   | 1   | 25488927:25888986   | 4.1E-11   | rs12027135 | 7.2E-66   | rs686631   | rs11802413  | 1                  | 99      | 6                           | 94      | 11                 | 89      |
|                      |                      |       | 1   | 25515852:25915911   | 4.1E-11   | rs12027135 | 1.2E-16   | rs909832   | rs3091242   | 85                 | 15      | 97                          | 3       | 98                 | 2       |
|                      |                      |       | 1   | 25428038:25828097   | 1.20E-10  | rs12027135 | 7.70E-11  | rs909832   | rs12027135  | 9                  | 91      | 33                          | 67      | 50                 | 50      |
|                      |                      |       | 1   | 25456834:25856893   | 1.20E-10  | rs12027135 | 0.0087    | rs909832   | rs12027135  | < 1                | 2       | < 1                         | < 1     | < 1                | < 1     |
| TMEM50A              | 4.00E-08             | LDL   | 1   | 25428038:25828097   | 4.10E-11  | rs12027135 | 7.70E-11  | rs909832   | rs12027135  | 9                  | 91      | 33                          | 67      | 50                 | 50      |
|                      |                      |       | 1   | 25456834:25856893   | 4.10E-11  | rs12027135 | 0.0087    | rs909832   | rs12027135  | < 1                | 2       | < 1                         | < 1     | < 1                | < 1     |
|                      |                      |       | 1   | 25488669:25888728   | 1.20E-10  | rs12027135 | 4.40E-11  | rs9689     | rs3091242   | 12                 | 88      | 41                          | 59      | 58                 | 42      |
| TMEM57               | 2.00E-145            | LDL   | 1   | 25488669:25888728   | 4.10E-11  | rs12027135 | 4.40E-11  | rs9689     | rs3091242   | 13                 | 87      | 43                          | 57      | 60                 | 39      |
|                      |                      |       | 1   | 25626305:26026364   | 1.20E-10  | rs12027135 | 2.10E-31  | rs873308   | rs12027135  | 1                  | 99      | 5                           | 94      | 10                 | 90      |
|                      |                      |       | 1   | 25624780:26024839   | 1.20E-10  | rs12027135 | 6.40E-08  | rs686631   | rs10903129  | 2                  | 97      | 9                           | 90      | 17                 | 82      |
| ANGPTL3              | 1.00E-13             | LDL   | 1   | 25626305:26026364   | 1.20E-10  | rs12027135 | 7.60E-223 | rs873308   | rs873308    | 2                  | 97      | 11                          | 88      | 21                 | 79      |
|                      |                      |       | 1   | 25624780:26024839   | 4.10E-11  | rs12027135 | 2.10E-31  | rs873308   | rs12027135  | 1                  | 99      | 5                           | 94      | 11                 | 89      |
|                      |                      |       | 1   | 25624780:26024839   | 4.10E-11  | rs12027135 | 6.40E-08  | rs686631   | rs12027135  | 2                  | 98      | 9                           | 90      | 16                 | 82      |
|                      |                      |       | 1   | 25625807:26025866   | 4.10E-11  | rs12027135 | 7.60E-223 | rs873308   | rs873308    | 3                  | 97      | 15                          | 85      | 26                 | 74      |
| DOCK7                | 1.00E-22             | LDL   | 1   | 62870388:63270447   | 2.90E-18  | rs3850634  | 1.90E-15  | rs636497   | rs3850634   | 9                  | 91      | 34                          | 66      | 51                 | 49      |
|                      |                      |       | 1   | 62870388:63270447   | 4.90E-41  | rs3850634  | 1.90E-15  | rs636497   | rs3850634   | 9                  | 90      | 34                          | 65      | 51                 | 49      |
|                      |                      |       | 1   | 62849818:63249877   | 8.80E-43  | rs2131925  | 1.90E-15  | rs636497   | rs2131925   | 8                  | 92      | 29                          | 70      | 45                 | 54      |
|                      |                      |       | 1   | 62720869:63120928   | 2.60E-18  | rs3850634  | 0.0049    | rs11485618 | rs3850634   | 5                  | 95      | 23                          | 77      | 37                 | 63      |
| CELSR2               | 5.00E-94             | LDL   | 1   | 62720869:63120928   | 2.60E-18  | rs3850634  | 0.0049    | rs11485618 | rs3850634   | 1                  | 13      | 2                           | 3       | 2                  | 1       |
|                      |                      |       | 1   | 62849818:63249877   | 4.90E-41  | rs3850634  | 1.90E-25  | rs11485618 | rs10789118  | 5                  | 95      | 20                          | 80      | 33                 | 67      |
|                      |                      |       | 1   | 62720869:63120928   | 4.90E-41  | rs3850634  | 0.0049    | rs11485618 | rs3850634   | 1                  | 14      | 2                           | 3       | 2                  | 1       |
|                      |                      |       | 1   | 62849818:63249877   | 8.80E-43  | rs2131925  | 1.90E-25  | rs11485618 | rs2131925   | 5                  | 94      | 23                          | 77      | 37                 | 63      |
| PSMA5                | 9.00E-17             | LDL   | 1   | 109618271:110018330 | 9.70E-171 | rs629301   | 1.50E-120 | rs646776   | rs629301    | < 1                | > 99    | 1                           | 99      | 2                  | 98      |
|                      |                      |       | 1   | 109618271:110018330 | 5.80E-131 | rs629301   | 1.50E-120 | rs646776   | rs629301    | < 1                | > 99    | 1                           | 99      | 3                  | 97      |
|                      |                      |       | 1   | 109744528:110144587 | 9.70E-171 | rs629301   | 1.50E-17  | rs599839   | rs629301    | < 1                | 99      | 4                           | 96      | 7                  | 93      |
|                      |                      |       | 1   | 109741904:110141963 | 9.70E-171 | rs629301   | 1.20E-07  | rs600806   | rs629301    | 98                 | 99      | < 1                         | < 1     | < 1                | < 1     |
| PSRC1                | 2.00E-271            | LDL   | 1   | 109741904:110141963 | 5.80E-131 | rs629301   | 1.50E-17  | rs599839   | rs629301    | < 1                | 99      | 3                           | 97      | 7                  | 93      |
|                      |                      |       | 1   | 109741904:110141963 | 5.80E-131 | rs629301   | 1.20E-07  | rs600806   | rs629301    | 98                 | 99      | < 1                         | < 1     | < 1                | < 1     |
|                      |                      |       | 1   | 109662208:110022267 | 9.70E-171 | rs629301   | 1.10E-299 | rs7528419  | rs629301    | < 1                | 99      | 3                           | 97      | 7                  | 93      |
|                      |                      |       | 1   | 109662208:110022267 | 5.80E-131 | rs629301   | 1.10E-299 | rs7528419  | rs629301    | < 1                | 99      | 3                           | 96      | 7                  | 93      |
| SORT1                | 2.00E-300            | LDL   | 1   | 109652373:110052432 | 9.70E-171 | rs629301   | 1.10E-299 | rs7528419  | rs629301    | < 1                | > 99    | 3                           | 96      | 7                  | 93      |
|                      |                      |       | 1   | 109656429:110056488 | 9.70E-171 | rs629301   | 1.10E-299 | rs7528419  | rs629301    | < 1                | > 99    | 3                           | 96      | 7                  | 93      |
|                      |                      |       | 1   | 109652373:110052432 | 5.80E-131 | rs629301   | 1.10E-299 | rs7528419  | rs629301    | < 1                | > 99    | 3                           | 96      | 7                  | 93      |
|                      |                      |       | 1   | 109656429:110056488 | 5.80E-131 | rs629301   | 1.10E-299 | rs7528419  | rs629301    | < 1                | > 99    | 3                           | 96      | 7                  | 93      |
| SYPL2                | 1.00E-23             | LDL   | 1   | 109024678:111024737 | 9.70E-171 | rs629301   | 7.10E-103 | rs2359653  | rs629301    | > 99               | < 1     | > 99                        | < 1     | > 99               | < 1     |
|                      |                      |       | 1   | 109821999:110222054 | 2.90E-168 | rs599839   | 0.0031    | rs7536292  | rs599839    | < 1                | > 99    | < 1                         | > 99    | < 1                | > 99    |
|                      |                      |       | 1   | 109824678:110224737 | 8.00E-52  | rs672569   | 7.10E-103 | rs1933182  | rs1933182   | > 99               | < 1     | > 99                        | < 1     | > 99               | < 1     |
|                      |                      |       | 1   | 109821999:110222054 | 4.10E-130 | rs599839   | 0.0031    | rs7536292  | rs599839    | < 1                | > 99    | < 1                         | > 99    | < 1                | > 99    |
| IFT172               | 7.00E-32             | TC    | 2   | 27467244:27867303   | 7.30E-27  | rs1260326  | 1.70E-130 | rs704791   | rs704791    | > 99               | < 1     | > 99                        | < 1     | > 99               | < 1     |
|                      |                      |       | 2   | 27467244:27867303   | 5.70E-133 | rs1260326  | 1.70E-130 | rs704791   | rs1260326   | > 99               | < 1     | > 99                        | < 1     | > 99               | < 1     |
| SLC39A8              | 3.00E-19             | HDL   | 4   | 102982958:103383017 | 7.20E-11  | rs13107325 | 3.80E-21  | rs13107325 | rs13107325  | < 1                | > 99    | < 1                         | > 99    | < 1                | > 99    |
|                      |                      |       | 4   | 102972446:103372505 | 7.20E-11  | rs13107325 | 0.027     | rs11733483 | rs13107325  | < 1                | > 99    | < 1                         | > 99    | < 1                | > 99    |
| HLA-DQB1             | 2.00E-13             | TC    | 6   | 32427977:32828028   | 2.60E-17  | rs17533167 | 2.10E-43  | rs3129720  | rs3129720   | > 99               | < 1     | > 99                        | < 1     | > 99               | < 1     |
|                      |                      |       | 6   | 32346553:32746610   | 4.00E-19  | rs3177928  | 1.90E-217 | rs477515   | rs477515    | > 99               | < 1     | > 99                        | < 1     | > 99               | < 1     |
| FRK                  | 4.00E-12             | LDL   | 6   | 116062804:116462863 | 2.90E-09  | rs11153594 | 6.60E-15  | rs195517   | rs195517    | 90                 | 10      | 98                          | 2       | 99                 | 1       |
|                      |                      |       | 6   | 116062804:116462863 | 1.70E-10  | rs9488822  | 6.60E-15  | rs195517   | rs9488822   | 61                 | 39      | 89                          | 11      | 94                 | 6       |
| PPP1R3B              | 1.00E-14             | LDL   | 8   | 8795514:9195573     | 7.40E-15  | rs2126259  | 6.20E-17  | rs2126259  | rs2126259   | < 1                | > 99    | 2                           | 98      | 4                  | 96      |
|                      |                      |       | 8   | 8793929:9193988     | 7.40E-15  | rs2126259  | 1.90E-17  | rs4240624  | rs9987289   | 1                  | 99      | 5                           | 94      | 10                 | 89      |
|                      |                      |       | 8   | 8795514:9195573     | 9.00E-24  | rs2126259  | 6.20E-17  | rs2126259  | rs2126259   | < 1                | > 99    | 2                           | 98      | 3                  | 97      |
|                      |                      |       | 8   | 8793929:9193988     | 9.00E-24  | rs2126259  | 1.90E-17  | rs4240624  | rs2126259   | 1                  | 98      | 8                           | 92      | 14                 | 85      |
|                      |                      |       | 8   | 8793929:9193988     | 6.40E-25  | rs9987289  | 6.20E-17  | rs2126259  | rs9987289   | < 1                | > 99    | 2                           | 98      | 4                  | 96      |
|                      |                      |       | 8   | 8795514:9195573     | 6.40E-25  | rs9987289  | 1.90E-17  | rs4240624  | rs9987289   | 1                  | 98      | 7                           | 93      | 14                 | 86      |
|                      |                      |       | 9   | 14971602:15371661   | 1.30E-13  | rs643531   | 8.10E-18  | rs581080   | rs686030    | 2                  | 98      | 10                          | 89      | 19                 | 81      |
|                      |                      |       | 11  | 18429356:18829415   | 2.50E-08  | rs10832963 | 7.20E-17  | rs10832963 | rs10832963  | < 1                | 99      | 3                           | 97      | 6                  | 94      |
| FADS1                | 5.00E-18             | LDL   | 11  | 18427988:18828047   | 2.50E-08  | rs10832963 | 2.90E-19  | rs10832963 | rs10832963  | < 1                | 99      | 3                           | 97      | 6                  | 94      |
|                      |                      |       | 11  | 61367291:61767350   | 1.20E-21  | rs174583   | 2.90E-20  | rs102275   | rs102275    | 2                  | 98      | 9                           | 91      | 17                 | 83      |
|                      |                      |       | 11  | 61367291:61767350   | 2.10E-22  | rs174550   | 2.90E-20  | rs102275   | rs102275    | 1                  | 99      | 7                           | 93      | 13                 | 87      |
|                      |                      |       | 11  | 61367291:61767350   | 5.40E-24  | rs174546   | 2.90E-20  | rs102275   | rs102275    | 1                  | 99      | 5                           | 95      | 10                 | 90      |
| ST3GAL4              | 2.00E-22             | HDL   | 11  | 61367291:61767350   | 1.50E-22  | rs174601   | 2.90E-20  | rs102275   | rs102275    | < 1                | 99      | 4                           | 96      | 8                  | 92      |
|                      |                      |       | 11  | 126084467:126484526 | 1.20E-15  | rs11220462 | 7.20E-25  | rs4307732  | rs4307732   | 2                  | 98      | 8                           | 92      | 15                 | 85      |
|                      |                      |       | 11  | 126084467:126484526 | 2.10E-11  | rs11220463 | 7.20E-25  | rs4307732  | rs7951028   | 1                  | 99      | 7                           | 93      | 13                 | 87      |
|                      |                      |       | 12  | 109793364:110193423 | 6.90E-15  | rs7134594  | 1.00E-38  | rs7954144  | rs7954144   | 2                  | 97      | 12                          | 88      | 21                 | 79      |
| MMAB                 | 2.00E-44             | HDL   | 14  | 24688259:25088318   | 4.40E-11  | rs2332328  | 1.10E-78  | rs6573778  | rs6573778   | < 1                | 99      | 3                           | 97      | 5                  | 95      |
|                      |                      |       | 15  | 43791310:44191369   | 4.70E-08  | rs9989313  | 1.20E-13  | rs2260160  | rs9989313   | 5                  | 95      | 20                          | 79      | 33                 | 66      |
|                      |                      |       | 15  | 58334099:58734158   | 8.80E-20  | rs1532085  | 5.00E-45  | rs1532085  | rs1532085   | < 1                | > 99    | 1                           | 99      | 2                  | 98      |
|                      |                      |       | 15  | 58045824:58445883   | 0.0042    | rs4646590  | 0.0027    | rs9796698  | rs9796698   | < 1                | > 99    | < 1                         | > 99    | < 1                | > 99    |
|                      |                      |       | 15  | 58334099:58734158   | 2.90E-96  | rs1532085  | 5.00E-45  | rs1532085  | rs1532085   | < 1                | > 99    | < 1                         | > 99    | < 1                | > 99    |
|                      |                      |       | 15  | 58045824:58445883   | 0.0014    | rs6493966  | 0.0027    | rs9796698  | rs8040266   | < 1                | > 99    | < 1                         | > 99    | < 1                | > 99    |
|                      |                      |       | 15  | 58334099:58734158   | 2.40E-13  | rs261342   | 5.00E-45  | rs1532085  | rs2043085   | 4                  | 96      | 18                          | 81      | 31                 | 69      |
|                      |                      |       | 15  | 58045824:58445883   |           |            |           |            |             |                    |         |                             |         |                    |         |

|         |          |     |    |                   |          |             |           |             |           |      |      |      |     |      |     |
|---------|----------|-----|----|-------------------|----------|-------------|-----------|-------------|-----------|------|------|------|-----|------|-----|
| TBKBP1  | 6.00E-10 | TC  | 17 | 45589357:45989416 | 1.80E-07 | rs8072100   | 2.10E-21  | rs9913503   | rs4794053 | 78   | 17   | 90   | 4   | 92   | 2   |
|         |          | LDL | 17 | 45589357:45989416 | 1.10E-07 | rs8072100   | 2.10E-21  | rs9913503   | rs6503807 | 47   | 51   | 79   | 17  | 87   | 9   |
| LIPG    | 4.00E-10 | TC  | 18 | 46918514:47318573 | 2.00E-19 | rs7239867   | 1.20E-11  | rs4939883   | rs4939883 | 1    | 99   | 5    | 94  | 11   | 89  |
|         |          | HDL | 18 | 46918514:47318573 | 2.70E-49 | rs7241918   | 1.20E-11  | rs4939883   | rs4939883 | < 1  | > 99 | 2    | 98  | 4    | 96  |
| ANGPTL4 | 4.00E-08 | HDL | 19 | 8239194:8639253   | 3.20E-08 | rs7255436   | 3.80E-09  | rs7255436   | rs7255436 | < 1  | > 99 | 2    | 98  | 5    | 95  |
| APOC4   | 4.00E-09 | TG  | 19 | 45248464:45648523 | 1.10E-30 | rs439401    | 9.40E-15  | 19:45430280 | rs439401  | 98   | 2    | > 99 | < 1 | > 99 | < 1 |
|         |          |     | 19 | 45252653:45652712 | 1.10E-30 | rs439401    | 1.10E-299 | rs1130742   | rs1130742 | > 99 | < 1  | > 99 | < 1 | > 99 | < 1 |
| LILRA3  | 9.00E-12 | HDL | 19 | 54602026:55002085 | 4.30E-16 | rs386000    | 8.20E-17  | 19:54793830 | rs386000  | < 1  | > 99 | 4    | 95  | 9    | 91  |
| CEP250  | 3.00E-08 | TC  | 20 | 33899702:34299761 | 3.80E-10 | rs2277862   | 0.022     | rs17424259  | rs2104417 | < 1  | < 1  | < 1  | < 1 | < 1  | < 1 |
| CPNE1   | 7.00E-41 | TC  | 20 | 34013995:34414054 | 3.80E-10 | rs2277862   | 7.30E-110 | rs6060524   | rs6060524 | 95   | 5    | 99   | 1   | 99   | < 1 |
| PLTP    | 3.00E-18 | TG  | 20 | 44327404:44727463 | 4.70E-18 | rs4810479   | 1.80E-20  | rs6065906   | rs4810479 | < 1  | > 99 | 3    | 97  | 5    | 95  |
|         |          | HDL | 20 | 44327404:44727463 | 1.90E-22 | rs6065906   | 1.80E-20  | rs6065906   | rs6065906 | < 1  | > 99 | 2    | 98  | 5    | 95  |
| UBE2L3  | 6.00E-13 | HDL | 22 | 21778264:22178323 | 1.10E-08 | 22:21932068 | 8.90E-13  | rs4821112   | rs2283790 | 3    | 96   | 16   | 84  | 27   | 72  |

Published results of loci correlating with both liver expression and one of the four lipid traits (Teslovich et al. Supplementary Table 8) and posterior probability of different signal (PP3) and common signal (PP4) after applying colocalisation test. Each row lists the results for one probe, and the multiple entries for the same locus and trait represent multiple probes mapping to the same locus. the columns **Biom pval** and **eQTL pval** report the lowest p-value found for the association with the trait listed and for the liver expression association respectively (after the datasets have been combined), with the corresponding SNP name (**Biom SNP** and **eQTL SNP**); the column **Best Causal** reports the SNP within the region with the highest posterior probability to be the true causal variant. The probabilities have been rounded to 1 significant figure.
