# Supplementary material for: Bayesian Test for Colocalisation between Pairs of Genetic Association Studies Using Summary Statistics
Source: PubMed Central journal article supplement (PMC4022491; doi:10.1371/journal.pgen.1004383), 2014-05-15
Supplement: pgen.1004383.s011.pdf [file pgen.1004383.s011.pdf]

**Table S2. eQTL/LDL colocalisation**

| Chr | Region              | Signal          | PP.H3.abf | PP.H4.abf | Tesl | Biom pval | Biom SNP   | eQTL pval | eQTL SNP   | Best Causal |
|-----|---------------------|-----------------|-----------|-----------|------|-----------|------------|-----------|------------|-------------|
| 1   | 109618271:110144587 | CELSR2          | 2         | 98        | Y    | 9.70E-171 | rs629301   | 1.50E-120 | rs646776   | rs629301    |
|     |                     | PSRC1           | 7         | 93        | Y    | 9.70E-171 | rs629301   | 1.10E-299 | rs7528419  | rs629301    |
|     |                     | SORT1           | 7         | 93        | Y    | 9.70E-171 | rs629301   | 1.10E-299 | rs7528419  | rs629301    |
|     |                     | PSMA5           | 7         | 93        | Y    | 9.70E-171 | rs629301   | 1.50E-17  | rs599839   | rs629301    |
| 1   | 150767063:151167122 | ANXA9           | 3         | 97        | N    | 6.50E-08  | rs267733   | 6.10E-08  | rs267734   | rs267733    |
| 1   | 25626305:26026364   | TMEM57          | 10        | 90        | Y    | 1.20E-10  | rs12027135 | 2.10E-31  | rs873308   | rs12027135  |
| 2   | 120908798:121308857 | INHBB           | 7         | 77        | N    | 3.80E-07  | rs2030746  | 4.90E-21  | rs17050272 | rs17050272  |
| 8   | 59158506:59558565   | UBXN2B          | 13        | 87        | N    | 3.90E-09  | rs1030431  | 3.50E-10  | rs11996829 | rs13263105  |
| 8   | 8795514:9392282     | PPP1R3B         | 4         | 96        | Y    | 7.40E-15  | rs2126259  | 6.20E-17  | rs2126259  | rs2126259   |
|     |                     | ENSG00000254235 | 13        | 87        | N    | 7.40E-15  | rs2126259  | 4.00E-13  | rs4841133  | rs9987289   |
| 9   | 2454062:2854121     | VLDLR           | 1         | 91        | N    | 8.00E-06  | rs3780181  | 1.40E-07  | rs3780181  | rs3780181   |
| 11  | 126084467:126484526 | ST3GAL4         | 15        | 85        | Y    | 1.20E-15  | rs11220462 | 7.20E-25  | rs4307732  | rs4307732   |
| 11  | 18429356:18829415   | SPTY2D1         | 6         | 93        | N    | 2.90E-07  | rs10128711 | 7.20E-17  | rs10832963 | rs10832963  |
| 11  | 61367291:61767350   | FADS1           | 17        | 83        | Y    | 1.20E-21  | rs174583   | 2.90E-20  | rs102275   | rs102275    |
| 12  | 111508189:111908248 | CUX2            | 2         | 98        | N    | 1.50E-09  | rs11065987 | 1.00E-17  | rs4378452  | rs3184504   |
| 14  | 24688259:25088318   | NYNRIN          | 5         | 95        | Y    | 4.40E-11  | rs2332328  | 1.10E-78  | rs6573778  | rs6573778   |
| 16  | 71894416:72310900   | HP              | 1         | 97        | N    | 1.80E-22  | rs2000999  | 1.30E-05  | rs2000999  | rs2000999   |
|     |                     | HPR             | 1         | 99        | N    | 1.80E-22  | rs2000999  | 4.20E-08  | rs2000999  | rs2000999   |
| 17  | 45562645:45962704   | KPNB1           | 16        | 83        | N    | 1.10E-07  | rs8072100  | 3.10E-09  | rs4794048  | rs8072100   |
| 20  | 12947054:13347113   | SPTLC3          | 4         | 86        | N    | 4.20E-06  | rs364585   | 2.30E-41  | rs168622   | rs364585    |

Positive (PP4 > 75%) eQTL/LDL colocalisation results between the liver eQTL dataset and the Teslovich meta-analysis using the most stringent prior for the probability that one SNP is associated with both traits,  $p_{12} = 10^{-6}$ . The column **Signal** includes genes that are part of overlapping regions and that colocalise at PP4 > 75%; the column **Region** represents the genomic coordinates for the start and stop of the signal; in the column **Tesl**, “Y” indicates that this signal with any of the genes included has been reported to be an intermediate for any of the four lipid biomarker associations by Teslovich et al. ; the columns **Biom pval** and **eQTL pval** report the lowest p-value found for LDL association and for the expression association respectively, with the corresponding SNP name (**Biom SNP** and **eQTL SNP**); the column **Best Causal** reports the SNP within the region with the highest posterior probability to be the true causal variant. The probabilities have been rounded to 1 significant figure.
