# Supplementary material for: Bayesian Test for Colocalisation between Pairs of Genetic Association Studies Using Summary Statistics
Source: PubMed Central journal article supplement (PMC4022491; doi:10.1371/journal.pgen.1004383), 2014-05-15
Supplement: pgen.1004383.s012.pdf [file pgen.1004383.s012.pdf]

**Table S3. eQTL/HDL colocalisation**

| Chr | Region              | Signal          | PP.H3.abf | PP.H4.abf | Tesl | Biom pval | Biom SNP   | eQTL pval | eQTL SNP    | Best Causal |
|-----|---------------------|-----------------|-----------|-----------|------|-----------|------------|-----------|-------------|-------------|
| 1   | 109618271:110144587 | CELSR2          | 3         | 97        | N    | 6.20E-08  | rs629301   | 1.50E-120 | rs646776    | rs646776    |
|     |                     | PSRC1           | 7         | 93        | N    | 6.20E-08  | rs629301   | 1.10E-299 | rs7528419   | rs629301    |
|     |                     | SORT1           | 7         | 93        | N    | 6.20E-08  | rs629301   | 1.10E-299 | rs7528419   | rs629301    |
|     |                     | PSMA5           | 7         | 92        | N    | 6.20E-08  | rs629301   | 1.50E-17  | rs599839    | rs12740374  |
| 2   | 85349026:85749085   | TGOLN2          | 17        | 83        | N    | 1.00E-07  | rs1053560  | 2.80E-80  | rs1044973   | rs1044973   |
| 4   | 102982958:103383017 | SLC39A8         | 1         | 99        | Y    | 7.20E-11  | rs13107325 | 3.80E-21  | rs13107325  | rs13107325  |
| 8   | 8795514:9392282     | PPP1R3B         | 14        | 86        | Y    | 6.40E-25  | rs9987289  | 1.90E-17  | rs4240624   | rs9987289   |
|     |                     | ENSG00000254235 | 4         | 96        | N    | 6.40E-25  | rs9987289  | 4.00E-13  | rs4841133   | rs9987289   |
| 9   | 14971602:15371661   | TTC39B          | 19        | 81        | Y    | 1.30E-13  | rs643531   | 8.10E-18  | rs581080    | rs686030    |
| 11  | 61367291:61767350   | FADS1           | 8         | 92        | Y    | 1.50E-22  | rs174601   | 2.90E-20  | rs102275    | rs102275    |
| 12  | 109793364:110193423 | MMAB            | 21        | 79        | Y    | 6.90E-15  | rs7134594  | 1.00E-38  | rs7954144   | rs7954144   |
| 12  | 111508189:111908248 | CUX2            | 2         | 89        | N    | 4.40E-06  | rs4766578  | 2.80E-16  | rs3184504   | rs3184504   |
| 15  | 58334099:59053162   | ALDH1A2         | 1         | 99        | Y    | 2.90E-96  | rs1532085  | 5.00E-45  | rs1532085   | rs1532085   |
|     |                     | LIPC            | 3         | 97        | Y    | 2.90E-96  | rs1532085  | 1.10E-25  | rs2043085   | rs1532085   |
| 15  | 96517293:96917352   | ENSG00000259359 | 2         | 87        | N    | 8.00E-06  | rs8023580  | 5.50E-13  | rs8023580   | rs8023580   |
| 18  | 46918514:47318573   | LIPG            | 4         | 96        | Y    | 2.70E-49  | rs7241918  | 1.20E-11  | rs4939883   | rs4939883   |
| 19  | 54578320:55002085   | LILRB2          | 9         | 88        | N    | 4.30E-16  | rs386000   | 1.70E-06  | rs416867    | rs386000    |
|     |                     | LILRA3          | 9         | 91        | Y    | 4.30E-16  | rs386000   | 8.20E-17  | 19:54793830 | rs386000    |
| 19  | 8239194:8639253     | ANGPTL4         | 5         | 95        | Y    | 3.20E-08  | rs7255436  | 3.80E-09  | rs7255436   | rs7255436   |
| 20  | 44327404:44727463   | PLTP            | 5         | 95        | Y    | 1.90E-22  | rs6065906  | 1.80E-20  | rs6065906   | rs6065906   |

Positive (PP4 > 75%) eQTL/HDL colocalisation results between the liver eQTL dataset and the Teslovich meta-analysis. Column and row headings are the same as in previous figure.
