# Supplementary material for: Bayesian Test for Colocalisation between Pairs of Genetic Association Studies Using Summary Statistics
Source: PubMed Central journal article supplement (PMC4022491; doi:10.1371/journal.pgen.1004383), 2014-05-15
Supplement: pgen.1004383.s013.pdf [file pgen.1004383.s013.pdf]

**Table S4. eQTL/TG colocalisation**

| Chr | Region            | Signal          | PP.H3.abf | PP.H4.abf | Tesl | Biom pval | Biom SNP   | eQTL pval | eQTL SNP  | Best Causal |
|-----|-------------------|-----------------|-----------|-----------|------|-----------|------------|-----------|-----------|-------------|
| 2   | 2754647:28005583  | GCKR            | 5         | 77        | N    | 5.70E-133 | rs1260326  | 1.50E-05  | rs1260326 | rs1260326   |
|     |                   | C2orf16         | 4         | 81        | N    | 5.70E-133 | rs1260326  | 8.30E-06  | rs1260326 | rs1260326   |
| 10  | 94637063:95037122 | CYP26A1         | 3         | 95        | N    | 2.40E-08  | rs2068888  | 3.50E-06  | rs4418728 | rs2068888   |
| 11  | 61367291:61767350 | FADS1           | 10        | 90        | Y    | 5.40E-24  | rs174546   | 2.90E-20  | rs102275  | rs102275    |
| 15  | 58653103:59053162 | LIPC            | 19        | 81        | Y    | 2.40E-13  | rs261342   | 1.10E-25  | rs2043085 | rs2043085   |
| 16  | 30904631:31304682 | VKORC1          | 23        | 77        | Y    | 3.30E-08  | rs11649653 | 1.10E-80  | rs749671  | rs749671    |
|     |                   | ENSG00000255439 | 23        | 77        | N    | 3.30E-08  | rs11649653 | 1.10E-80  | rs749671  | rs749671    |
| 16  | 71894416:72310900 | HP              | 2         | 75        | N    | 5.70E-06  | rs2000999  | 2.10E-06  | rs2000999 | rs2000999   |
|     |                   | HPR             | 2         | 89        | N    | 5.70E-06  | rs2000999  | 4.20E-08  | rs2000999 | rs2000999   |
| 20  | 44327404:44727463 | PLTP            | 5         | 95        | Y    | 4.70E-18  | rs4810479  | 1.80E-20  | rs6065906 | rs4810479   |

Positive (PP4 > 75%) eQTL/TG colocalisation results between the liver eQTL dataset and the Teslovich meta-analysis. Column and row headings are the same as in previous figure.
