# Supplementary material for: Bayesian Test for Colocalisation between Pairs of Genetic Association Studies Using Summary Statistics
Source: PubMed Central journal article supplement (PMC4022491; doi:10.1371/journal.pgen.1004383), 2014-05-15
Supplement: pgen.1004383.s014.pdf [file pgen.1004383.s014.pdf]

**Table S5. eQTL/TC colocalisation**

| Chr | Region              | Signal   | PP.H3.abf | PP.H4.abf | Tesl | Biom pval | Biom SNP   | eQTL pval | eQTL SNP   | Best Causal |
|-----|---------------------|----------|-----------|-----------|------|-----------|------------|-----------|------------|-------------|
| 1   | 109618271:110144587 | CELSR2   | 3         | 97        | Y    | 5.80E-131 | rs629301   | 1.50E-120 | rs646776   | rs629301    |
|     |                     | PSRC1    | 7         | 93        | Y    | 5.80E-131 | rs629301   | 1.10E-299 | rs7528419  | rs629301    |
|     |                     | SORT1    | 7         | 93        | Y    | 5.80E-131 | rs629301   | 1.10E-299 | rs7528419  | rs629301    |
|     |                     | PSMA5    | 7         | 93        | Y    | 5.80E-131 | rs629301   | 1.50E-17  | rs599839   | rs629301    |
| 1   | 25626305:26026364   | TMEM57   | 11        | 89        | Y    | 4.10E-11  | rs12027135 | 2.10E-31  | rs873308   | rs12027135  |
| 2   | 20201795:20601854   | SDC1     | 17        | 82        | N    | 1.20E-07  | rs1473886  | 6.70E-09  | rs907866   | rs1107851   |
| 2   | 27546474:28005583   | GCKR     | 5         | 77        | N    | 7.30E-27  | rs1260326  | 1.50E-05  | rs1260326  | rs1260326   |
|     |                     | C2orf16  | 4         | 81        | N    | 7.30E-27  | rs1260326  | 8.30E-06  | rs1260326  | rs1260326   |
| 3   | 32322873:32722932   | CMTM6    | 8         | 77        | N    | 9.10E-07  | rs7640978  | 2.70E-07  | rs17029597 | rs17029597  |
| 6   | 34355095:34755154   | C6orf106 | 15        | 85        | N    | 4.70E-11  | rs2814982  | 4.50E-09  | rs3800461  | rs3800461   |
| 8   | 59158506:59558565   | UBXN2B   | 15        | 85        | N    | 8.80E-13  | rs1030431  | 3.50E-10  | rs11996829 | rs13263105  |
| 8   | 8795514:9195573     | PPP1R3B  | 3         | 97        | Y    | 9.00E-24  | rs2126259  | 6.20E-17  | rs2126259  | rs2126259   |
| 9   | 14971602:15371661   | TTC39B   | 1         | 99        | N    | 3.10E-09  | rs581080   | 8.10E-18  | rs581080   | rs581080    |
| 10  | 17079389:17479448   | VIM      | 5         | 93        | N    | 7.20E-07  | rs7903259  | 9.80E-09  | rs10904908 | rs7903259   |
| 11  | 126084467:126484526 | ST3GAL4  | 13        | 87        | Y    | 2.10E-11  | rs11220463 | 7.20E-25  | rs4307732  | rs7951028   |
| 11  | 18429356:18829415   | SPTY2D1  | 6         | 94        | Y    | 2.50E-08  | rs10832963 | 7.20E-17  | rs10832963 | rs10832963  |
| 11  | 61367291:61767350   | FADS1    | 13        | 87        | Y    | 2.10E-22  | rs174550   | 2.90E-20  | rs102275   | rs102275    |
| 12  | 111508189:111908248 | CUX2     | 2         | 98        | N    | 2.40E-11  | rs4766578  | 2.80E-16  | rs3184504  | rs3184504   |
| 14  | 24688259:25088318   | NYNRIN   | 3         | 97        | N    | 1.10E-07  | rs6573778  | 1.10E-78  | rs6573778  | rs6573778   |
| 15  | 58334099:59053162   | ALDH1A2  | 2         | 98        | Y    | 8.80E-20  | rs1532085  | 5.00E-45  | rs1532085  | rs1532085   |
|     |                     | LIPC     | 3         | 97        | Y    | 8.80E-20  | rs1532085  | 1.10E-25  | rs2043085  | rs2043085   |
| 16  | 56310220:56710279   | OGFOD1   | 7         | 84        |      | 3.20E-06  | rs11644679 | 3.40E-11  | rs11649379 | rs11644679  |
| 16  | 71894416:72310900   | HP       | 1         | 97        | N    | 3.20E-24  | rs2000999  | 2.10E-06  | rs2000999  | rs2000999   |
|     |                     | HPR      | 1         | 99        | N    | 3.20E-24  | rs2000999  | 4.20E-08  | rs2000999  | rs2000999   |
| 17  | 45562645:45962704   | KPNB1    | 13        | 86        | N    | 1.80E-07  | rs8072100  | 3.10E-09  | rs4794048  | rs8072100   |
| 18  | 46918514:47318573   | LIPG     | 11        | 89        | Y    | 2.00E-19  | rs7239867  | 1.20E-11  | rs4939883  | rs4939883   |
| 22  | 46433083:46833138   | PPARA    | 10        | 81        | N    | 3.60E-06  | rs4253772  | 6.00E-08  | rs11704979 | rs4253772   |

Positive (PP4 > 75%) eQTL/TC colocalisation results between the liver eQTL dataset and the Teslovich meta-analysis. TC column and row headings are the same as in previous figure.
